# Supplementary material for: Selectable Nanopattern Arrays for Nanolithographic Imprint and Etch‐Mask Applications
Source: PubMed Central journal article supplement (PMC5115431; doi:10.1002/advs.201500016), 2015-05-06
Supplement: ADVS-2-0k-s001.pdf [file ADVS-2-0k-s001.pdf]

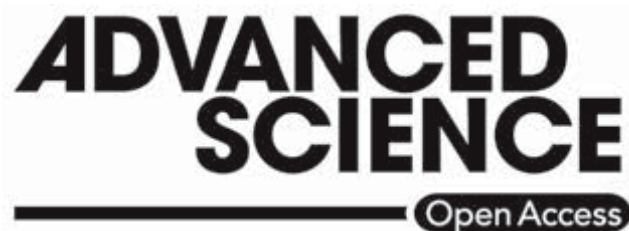

## Supporting Information

for *Adv. Sci.*, DOI: 10.1002/advs. 201500016

Selectable Nanopattern Arrays for Nanolithographic Imprint  
and Etch-Mask Applications

*Hyeon-Ho Jeong, Andrew G. Mark, Tung-Chun Lee,  
Kwanghyo Son, Wenwen Chen, Mariana Alarcón-Correa,  
Insook Kim, Gisela Schütz, and Peer Fischer\**

## Supporting Information

**Selectable nanopattern arrays for nanolithographic imprint and etch-mask applications**

*Hyeon-Ho Jeong<sup>1</sup>, Andrew G. Mark<sup>1</sup>, Tung-Chun Lee<sup>1,2</sup>, Kwanghyo Son<sup>1</sup>, Wenwen Chen<sup>1,3</sup>, Mariana Alarcón-Correa<sup>1,4</sup>, Insook Kim<sup>1,4</sup>, Gisela Schütz<sup>1</sup>, and Peer Fischer<sup>1,4,\*</sup>*

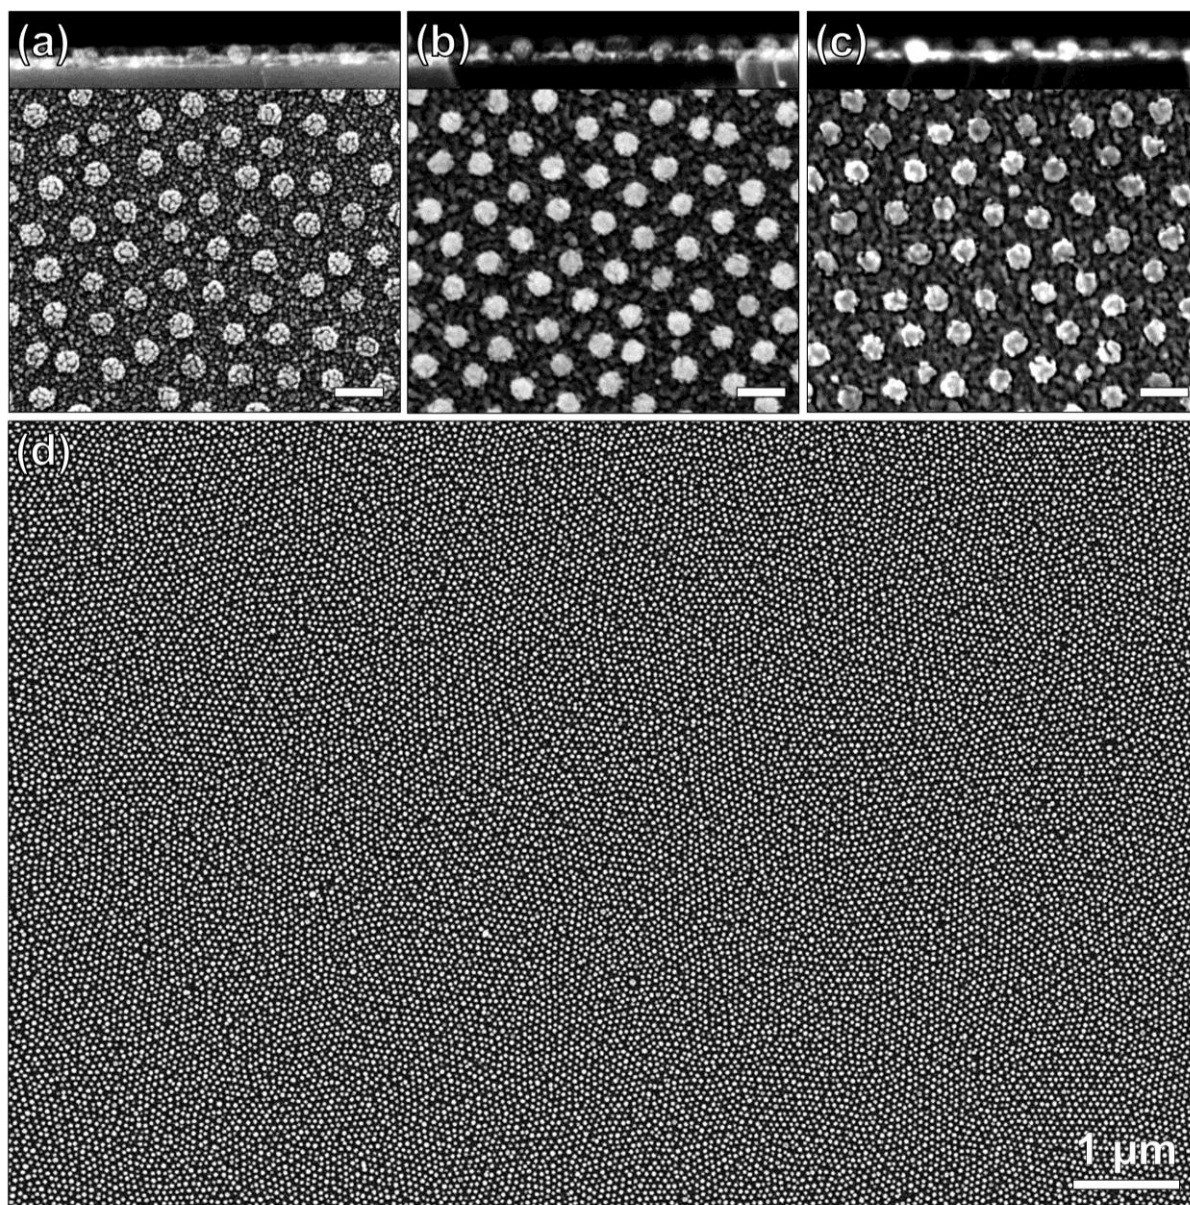

**Figure S1.** SEM images of the multifunctional nanopatterns with, respectively, a) 5 nm, b) 10 nm, and c) 15 nm thick Au film on the array of Au-Ag-Au NPs (Scale bar: 100 nm). d) Large-area SEM image of the array of the multifunctional pattern with a 10 nm thick Au film.

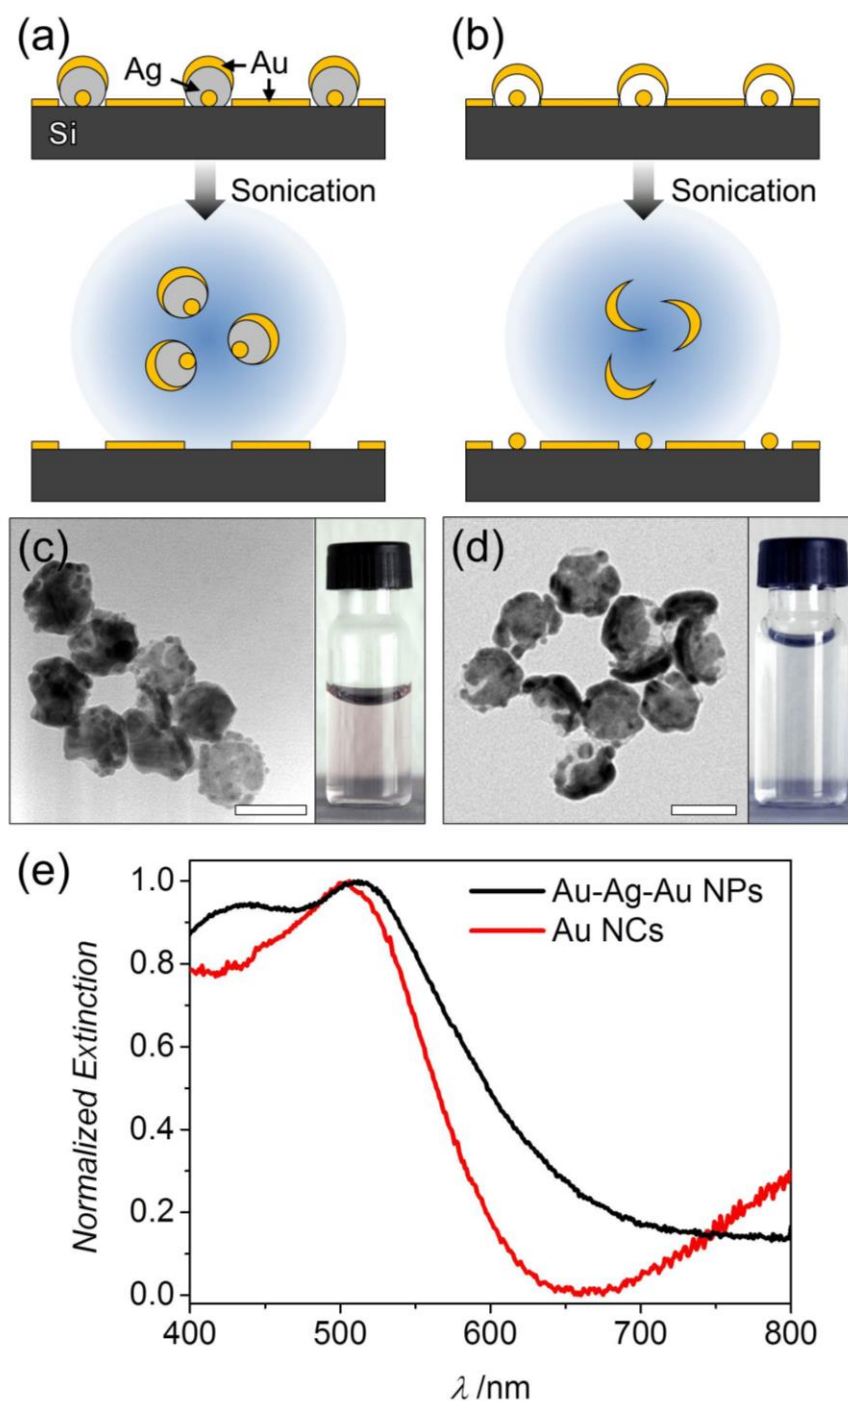

**Figure S2.** Hybrid nanocolloids. Schematic views of the fabrication of a) colloidal Au-Ag-Au hybrid NPs from the multifunctional nanopattern and b) colloidal Au NCs from the hollow nanodome pattern. TEM images of c) Au-Ag-Au hybrid NPs and d) Au NCs (scale bar: 50 nm). The photos of the 2ml glass vials show the corresponding colloidal solution of the Au-Ag-Au hybrid NPs and the Au NCs. e) Extinction spectra of colloidal Au-Ag-Au hybrid NPs (black line) and colloidal Au NCs (red line).

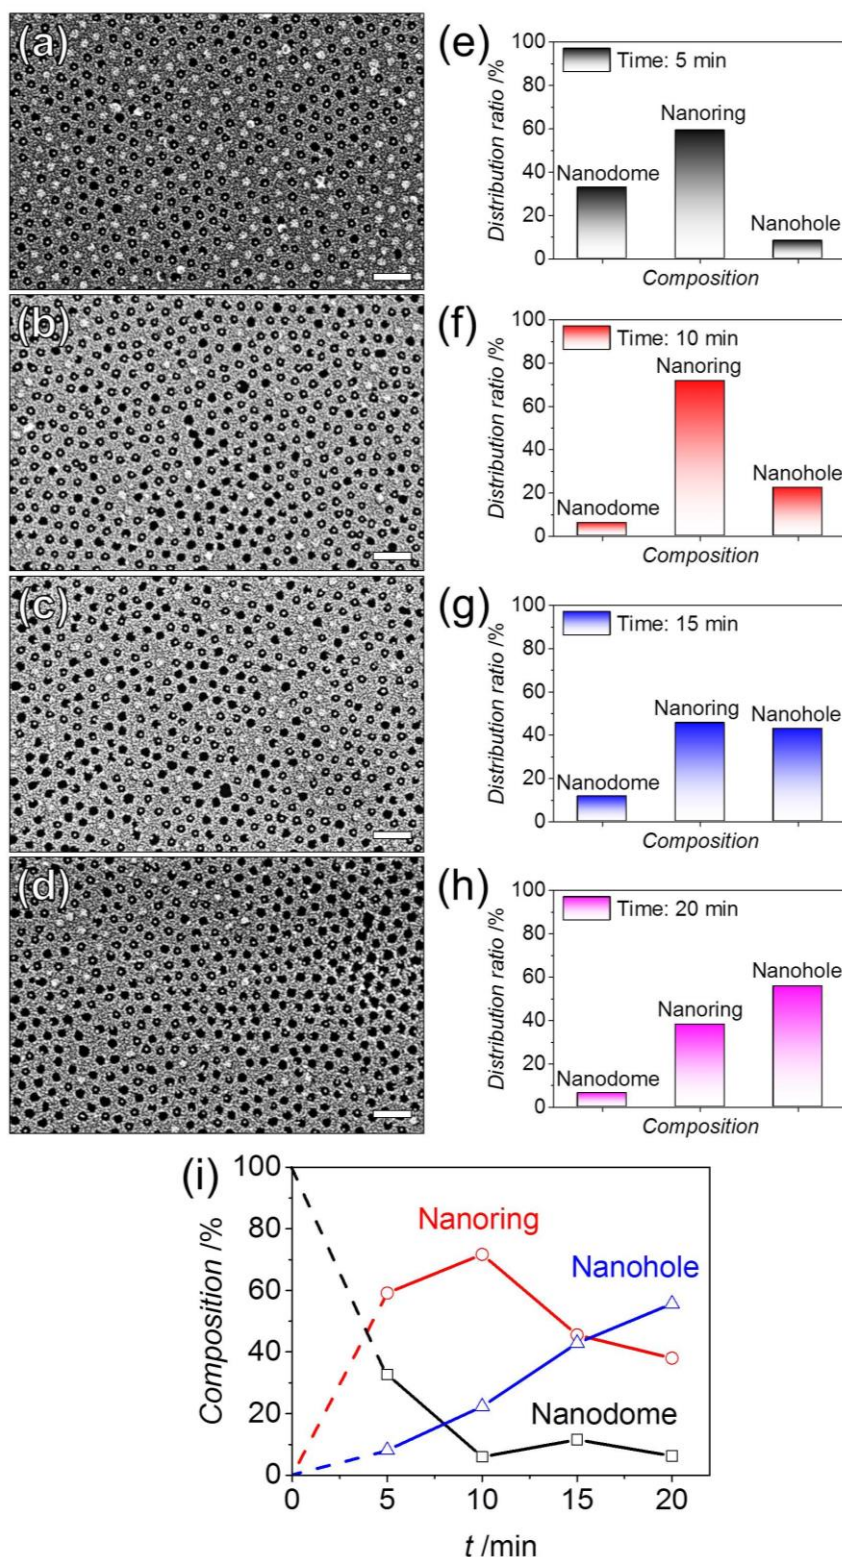

**Figure S3.** Experimental optimization of the fabrication of the nanoring pattern from the multifunctional pattern by ultrasonication. SEM images of the nanoring patterns after sonication for a) 5 min, b) 10 min, c) 15 min, and d) 20 min, and e)–h) their corresponding distribution ratios for the hollow nanodome pattern, the nanoring pattern, and the nanohole pattern (Scale bar: 200 nm). i) Composition trends of the hollow nanodome pattern (black squares), the nanoring pattern (red rings), and the nanohole pattern (blue triangles) as a function of time.



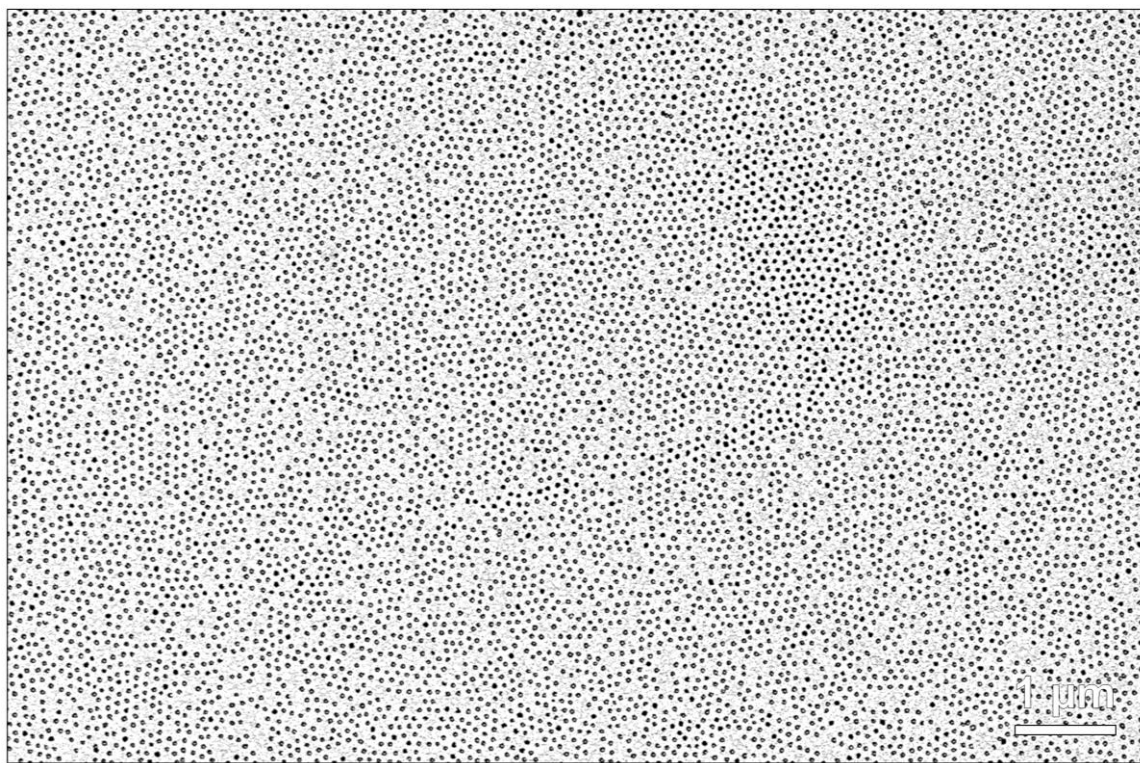

**Figure S4.** Large-area SEM image of the fabricated nanoring pattern.

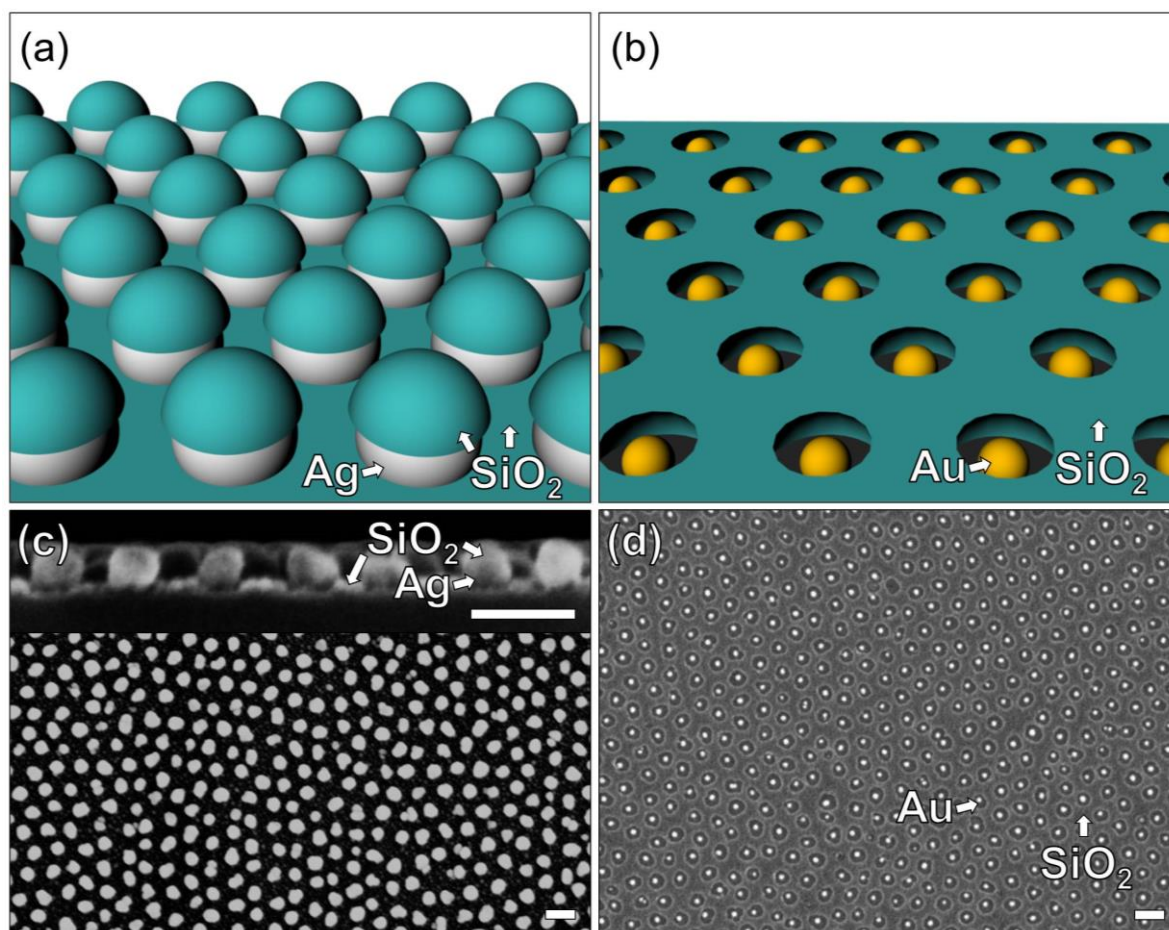

**Figure S5.** Fabrications of a) multifunctional nanopattern and b) nanoring patterns with a SiO<sub>2</sub> film. SEM images of c) the multifunctional nanopattern (top: side view, bottom: top view) and d) the nanoring pattern (scale bar: 100 nm).

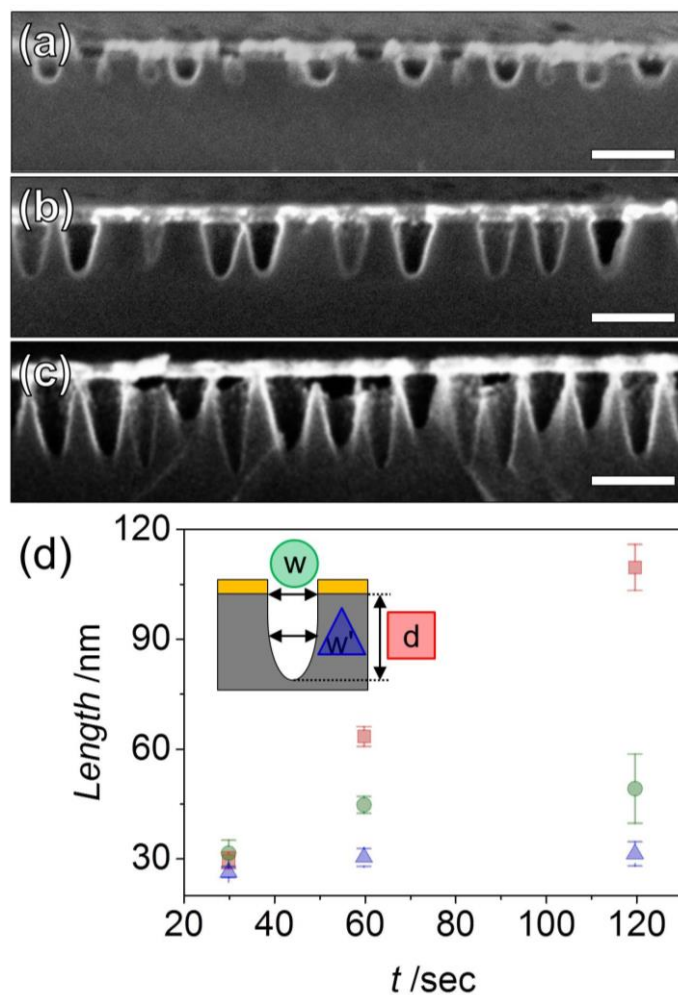

**Figure S6.** RIE on the nanohole pattern. Side view of the SEM images of the etched silicon substrate after etching for a) 30 s, b) 60 s, and c) 120 s under  $\text{SF}_6/\text{O}_2$  plasma environment (scale bar: 100 nm). d) The plot of the etched depth ( $d$ , red square), width ( $w$ , green circle), and full width at half maximum ( $w'$ , blue triangle) of Si substrate as a function of time. The etch rate of  $d$ ,  $w$ , and  $w'$  were  $\sim 0.95$  nm/s,  $\sim 0.28$  nm/s, and  $\sim 0.06$  nm/s.

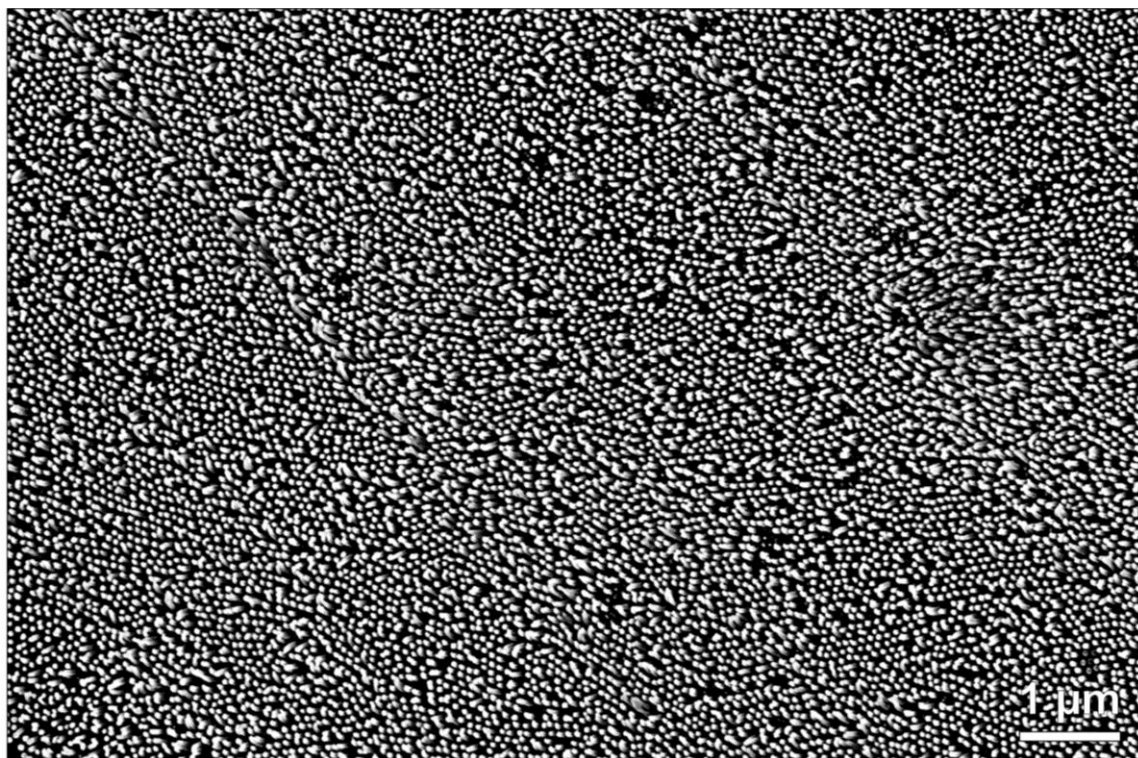

**Figure S7.** Large-area SEM image of the fabricated polymer NWs.
